# Supplementary material
Source: HighWire-hosted journal article supplement (http://jpet.aspetjournals.org/highwire/filestream/144294/field_highwire_adjunct_files/0/254664Supplemental_Tables.pdf)
Supplement: 254664Supplemental_Tables.pdf [file 254664Supplemental_Tables.pdf]

# Online Supplement

1  
2  
3  
4  
5  
6  
7  
8  
9  
10  
11  
12  
13  
14  
15  
16  
17  
18  
19  
20  
21  
22  
23  
24

**Title: Artificial oxygen carriers- past, present and the future-a review of the most innovative and clinically relevant concepts**

**Running title: Update on concepts of artificial oxygen carriers**

**Katja B. Ferenz<sup>1\*</sup> and Andrea U. Steinbicker<sup>2</sup>**

- 1) University of Duisburg-Essen, Institute of Physiology, University Hospital Essen, Hufelandstr. 55, 45122 Essen, Germany, [katja.ferenz@uk-essen.de](mailto:katja.ferenz@uk-essen.de)
- 2) Westphalian Wilhelms-University Muenster, University Hospital Muenster, Department of Anesthesiology, Intensive Care and Pain Medicine, Albert-Schweitzer-Campus 1, Building A1, 48149 Muenster, Germany, [andrea.steinbicker@ukmuenster.de](mailto:andrea.steinbicker@ukmuenster.de)

\*) corresponding author: Prof. Dr. rer. nat. Katja B. Ferenz, Institute of Physiology, University Hospital Essen, Hufelandstr. 55, 45122 Essen, Germany, Phone: (49) 201-723 4609; Fax: (49) 201-723 4648; E-Mail: [katja.ferenz@uk-essen.de](mailto:katja.ferenz@uk-essen.de)

25

26 Supplemental Table 1: Recent clinical trials with Hemopure

| <b>phase</b> | <b>trial number</b> | <b>locations</b>                 | <b>condition</b>                                    | <b>status</b>                                      |
|--------------|---------------------|----------------------------------|-----------------------------------------------------|----------------------------------------------------|
| II           | NCT00479895         | Netherlands                      | elective coronary revascularization                 | completed                                          |
| II           | NCT00317512         | Netherlands, Belgium and Germany | elective coronary revascularization                 | completed with study results(Serruys et al., 2008) |
| II           | ACTRN12615000522516 | Australia                        | Bridging to hospital of shocked trauma patients     | Ethics approval since 2013, not started yet        |
|              | 2005-003639-30      | UK                               | Tissue preservation during cardiopulmonary bypass   | ongoing since 2005                                 |
| II           | 2005-003637-41      | UK                               | wound healing in patient with lower limb amputation | ongoing since 2005                                 |

27

28

29

30

31

## 32 Supplemental Table 2: Clinical studies on other HBOCs

| <b>HBOC</b>                                        | <b>phase</b> | <b>trial number</b>                                             | <b>locations</b>                                                     | <b>condition</b>                                                                                     | <b>status</b>                                                                                                                                                                          |
|----------------------------------------------------|--------------|-----------------------------------------------------------------|----------------------------------------------------------------------|------------------------------------------------------------------------------------------------------|----------------------------------------------------------------------------------------------------------------------------------------------------------------------------------------|
| Hemolink                                           | II/III       | NCT00038454                                                     | USA                                                                  | Primary coronary artery bypass grafting in combination with intraoperative autologous blood donation | suspended since 2005                                                                                                                                                                   |
| Polyheme                                           | III          | NCT00076648                                                     | USA                                                                  | Bridging to hospital of shocked trauma patients                                                      | Unknown, study results(Moore et al., 2009a; Moore et al., 2009b)                                                                                                                       |
| Pyridoxalated hemoglobin polyoxyethylene conjugate | III          | NCT00021502<br>2008-000504-92                                   | USA<br>Netherlands,<br>Germany,<br>Austria, UK,<br>Spain,<br>Belgium | Distributive shock + systemic inflammatory response syndrome                                         | Discontinued in all countries due to low enrollment because of errors in study design. But completed as phase II(Elmer et al., 2012) study with study results(Kinasewitz et al., 2008) |
| Hemotech                                           | I            | Approved by the Ethics Committee of Kinshasa, Zaire (now Congo) | Congo                                                                | Sickle cell anemia in 9 children.                                                                    | Completed with study results (Feola et al., 1992; Simoni et al., 2014)                                                                                                                 |

33

34

Supplemental Table 3: Trials with Hemospan/ MP4OX and MP4CO

| HBOC  | phase | trial number                  | locations                                                                                                                                                                   | condition                                                           | status                                                                                                                                                                                                     |
|-------|-------|-------------------------------|-----------------------------------------------------------------------------------------------------------------------------------------------------------------------------|---------------------------------------------------------------------|------------------------------------------------------------------------------------------------------------------------------------------------------------------------------------------------------------|
| MP4OX | II    | NCT00633659<br>2007-001538-15 | Sweden                                                                                                                                                                      | Chronic critical limb ischemia                                      | completed<br>prematurely ended                                                                                                                                                                             |
| MP4OX | I, II | NCT00494949                   | Sweden                                                                                                                                                                      | Reducing transfusion of RBCs<br>in elective orthopedic surgery      | completed with study results(Olofsson et al., 2006)                                                                                                                                                        |
| MP4OX | II    | NCT00425334                   | USA                                                                                                                                                                         | Reducing transfusion of RBCs<br>in elective orthopedic surgery      | completed                                                                                                                                                                                                  |
| MP4OX | III   | NCT00421200<br>2006-002513-12 | Belgium, Czech Republic,<br>Netherlands, Poland, Sweden, UK                                                                                                                 | Prevent hypotension in<br>elective surgery                          | completed (Czech Republic, Belgium, Sweden,<br>Netherlands with study results)(Olofsson et al.,<br>2011)<br>ongoing in UK<br>(probably missing update: Sponsor terminated<br>operations in 2013)           |
| MP4OX | III   | NCT00420277<br>2006-002514-35 | Belgium, Czech Republic,<br>Netherlands, Poland, Sweden, UK                                                                                                                 | Treating hypotension in<br>elective surgery                         | completed in Czech Republic, Belgium, Sweden<br>and Netherlands with study results(van der Linden<br>et al., 2011)<br>ongoing in UK<br>(probably missing update: Sponsor terminated<br>operations in 2013) |
| MP4OX | IIc   | NCT01973504                   | Australia, Belgium, Brazil, France,<br>Germany, Israel, New Zealand,<br>Norway, South Africa, Switzerland,<br>United Kingdom                                                | MP4Ox in combination with<br>standard treatment in severe<br>trauma | 2013 withdrawn prior to enrolment (probably<br>missing update: Sponsor terminated operations in<br>2013)                                                                                                   |
| MP4OX | IIb   | NCT01262196<br>2010-023129-39 | Australia, Austria, Brazil, Colombia,<br>France, Germany, Israel, New<br>Zealand, Norway, Singapore, South<br>Africa, Spain, Switzerland, United<br>Kingdom, Belgium, Italy | MP4Ox in combination with<br>standard treatment in severe<br>trauma | completed in all countries except Spain, Norway<br>and Italy<br>ongoing in Spain, Norway and Italy (probably<br>missing update: Sponsor terminated operations in<br>2013)                                  |
| MP4OX | IIa   | NCT01004198<br>2009-013115-35 | France, Germany, South Africa, UK                                                                                                                                           | MP4Ox in combination with<br>standard treatment in severe<br>trauma | completed in all countries except France, ongoing<br>in France (probably missing update: Sponsor<br>terminated operations in 2013)                                                                         |
| MP4CO | Ib    | NCT01356485                   | France, Jamaica, Lebanon, UK                                                                                                                                                | Stable sickle cell anemia                                           | completed with study results(Keipert and<br>Investigators, 2016)                                                                                                                                           |
| MP4CO | II    | NCT01925001<br>2013-001600-11 | Bahrain, Belgium, Brazil, France,<br>Lebanon, Netherlands, Qatar,                                                                                                           | Vaso-occlusive crisis in sickle<br>cell anemia                      | withdrawn prior to enrolment (Sponsor ceased<br>operation)                                                                                                                                                 |

|  |  |                        |  |  |
|--|--|------------------------|--|--|
|  |  | Turkey, United Kingdom |  |  |
|--|--|------------------------|--|--|

*Comment to Supplemental Table 3: Please note, that some clinical trials are still listed as “recruiting/ongoing” although the sponsor stopped funding and thereby terminated the study.*

Supplemental Table 4: Clinical trials with Sanguinate

| <b>phase</b> | <b>trial number</b> | <b>Locations</b>                               | <b>condition</b>                                                                                | <b>status</b>                                                        |
|--------------|---------------------|------------------------------------------------|-------------------------------------------------------------------------------------------------|----------------------------------------------------------------------|
| I            | NCT01847222         | Israel                                         | Safety and pharmacokinetics in healthy volunteers                                               | terminated due to completion of competing study (ACTRN1261200103383) |
| I            | ACTRN12612001033831 | Australia                                      | Safety and pharmacokinetics in healthy volunteers                                               | completed with study results(Misra et al., 2014)                     |
| I            | NCT02754999         | USA                                            | Severe anemia                                                                                   | completed                                                            |
| II           | NCT02323685         | USA                                            | delayed cerebral ischemia after acute aneurysmal subarachnoid hemorrhage                        | completed                                                            |
| Ib           | NCT01848925         | Colombia, Panama                               | Sickle cell disease                                                                             | completed with study results(Misra et al., 2017)                     |
| I            | NCT01374165         | Israel                                         | Sickle cell disease                                                                             | suspended (cancelled)                                                |
| II           | NCT02600390         | Panama, Dominican Republic                     | Sickle cell disease associated leg ulcer                                                        | completed                                                            |
| II           | NCT02672540         | Panama, Dominican Republic, Honduras, Colombia | Vaso-occlusive crisis in sickle cell disease                                                    | completed                                                            |
| II           | NCT02411708         | USA                                            | Vaso-occlusive crisis in sickle cell disease                                                    | completed                                                            |
| II, III      | NCT02490202         | USA                                            | Reduction of delayed graft function with infusion of Sanguinate prior to kidney transplantation | completed                                                            |
| Ib           | NCT02437422         | USA                                            | Impact on humoral sensitization in end stage renal disease                                      | completed                                                            |
| II           | NCT02658162         | Not provided                                   | Reduction of delayed graft function in kidney transplant patients                               | withdrawn                                                            |

Supplemental Table 5: Sophistically engineered Hgbs

| product                   | Idea                                                                    | reference                                                          |
|---------------------------|-------------------------------------------------------------------------|--------------------------------------------------------------------|
| OxyVita                   | Linking of bovine Hgb-monomers via physiologically present amide groups | Wollocko 2017(Wollocko et al., 2017)/ Jahr 2012(Jahr et al., 2012) |
| Poly-Hb-tempol            | Glutaraldehyde polymerized porcine Hgb and tempol with SOD activity     | Wu 2017(Wu et al., 2017)                                           |
| Sanflow, VitalHeme (PNPH) | Polynitroxylated bovine Hgb                                             | Brockman 2017(Brockman et al., 2017)(LLC)                          |
| YQ23                      | Non-polymeric cross-linked tetrameric mammalian Hgb                     | Li, 2016(Li et al., 2017)(Limited, 2017)                           |
| BAEGF-Hb                  | Antioxidative Bromoacethylethyleneglycol-ferulate-linked human Hgb      | Guo, 2016(Guo et al., 2016)                                        |
| PolyPHb/ bPEG-Hb          | Polymerized human placenta Hgb/ pegylated bovine Hgb                    | Li 2015(Li et al., 2015)/ Wang, 2016(Wang et al., 2017b)           |

Supplemental Table 6: Standard Hgb plus engineered envelope

| product                                                                                    | Idea                                                                                                                                                    | reference                                                                                                                                  |
|--------------------------------------------------------------------------------------------|---------------------------------------------------------------------------------------------------------------------------------------------------------|--------------------------------------------------------------------------------------------------------------------------------------------|
| HbVesicles                                                                                 | Human Hgb encapsulated in biocompatible liposomes                                                                                                       | Sakai 2017(Sakai, 2017), Azuma 2017(Azuma et al., 2017), Kohno 2017(Kohno et al., 2017)                                                    |
| HbMP-700                                                                                   | Bovine Hgb in microparticles                                                                                                                            | Baeumler, 2014(Baumler et al., 2014), Kao, 2018(Kao et al., 2018)                                                                          |
| ErythroMer                                                                                 | Human Hgb in tunable polymer shell, pH sensitive O <sub>2</sub> -affinity                                                                               | Pan, 2016(Pan et al., 2016; Kalocyte, 2017)                                                                                                |
| HbN                                                                                        | Bovine Hgb conjugated polymer micelles                                                                                                                  | Qi, 2016(Qi et al., 2016)                                                                                                                  |
| HbP                                                                                        | polymer encapsulated bovine Hgb                                                                                                                         | Lu 2016(Lu et al., 2016) and Li 2014(Li et al., 2014)                                                                                      |
| LEH                                                                                        | Human Hgb in liposomes                                                                                                                                  | Yadav, 2016(Yadav et al., 2016), Fukui 2017(Fukui et al., 2017)                                                                            |
| <ul style="list-style-type: none"> <li>• Hb-PDA</li> <li>• PDA-Hb-microcapsules</li> </ul> | <ul style="list-style-type: none"> <li>• Antioxidative polydopamine-coated bovine Hgb nanocapsules</li> <li>• Polydopamine-coated bovine Hgb</li> </ul> | <ul style="list-style-type: none"> <li>• Wang, 2017(Wang et al., 2017a; Wang et al., 2018)</li> <li>• Yu, 2018(Yu et al., 2018)</li> </ul> |
| Hemoact                                                                                    | Cluster of human Hgb + human albumin                                                                                                                    | Haruki, 2015(Haruki et al., 2015)                                                                                                          |
| RBCM                                                                                       | RBC-like microgel particles loaded with bovine Hgb                                                                                                      | Chen, 2012(Chen et al., 2012)                                                                                                              |
| Mal-PEG-βXL-Hb                                                                             | Inside-out pegylated Hgb                                                                                                                                | Webster, 2017(Webster et al., 2017)                                                                                                        |
| Hemoglobin loaded nanoliposomes                                                            | Liposomes with human Hgb                                                                                                                                | Qu, 2017(Qu et al., 2017)                                                                                                                  |
|                                                                                            | Human Hgb adsorbed to silica nanoparticles                                                                                                              | Devineau, 2018(Devineau et al., 2018)                                                                                                      |

Supplemental Table 7: Other artificial blood products in preclinical stage

| <b>product</b>                 | <b>Idea</b>                                                                                           | <b>reference</b>                                                    |
|--------------------------------|-------------------------------------------------------------------------------------------------------|---------------------------------------------------------------------|
| HemoCD                         | Iron-porphyrin/ cyclodextrin complex                                                                  | Kitagishi, 2017(Kitagishi et al., 2017)                             |
| PEG-LtEC                       | Pegylated earthworm Hgb                                                                               | Jani, 2017(Jani et al., 2017)                                       |
| HrBOC                          | hemerythrin (from marine worms) copolymerized with glutaraldehyde, human serum albumin or ruberythrin | Toma, 2018(Toma et al., 2018)                                       |
| Cobalt-replaced myoglobin      | Resulting in p50 of 37mmHg                                                                            | Neya, 2014(Neya et al., 2014)                                       |
| Cobaltporphyrin-based micelles | Hgb- free oxygen transporter in micelles                                                              | Shen, 2016(Shen et al., 2016)                                       |
| LOMs/PHMs                      | Lipid-based oxygen microbubbles/Polymer hollow microparticles (stabilized thin wall)                  | Black, 2017(Black et al., 2017)/Seekell, 2016(Seekell et al., 2016) |

## Literature

- Azuma H, Fujihara M and Sakai H (2017) Biocompatibility of HbV: Liposome-Encapsulated Hemoglobin Molecules-Liposome Effects on Immune Function. *Journal of functional biomaterials* **8**.
- Baumler H, Xiong Y, Liu ZZ, Patzak A and Georgieva R (2014) Novel hemoglobin particles--promising new-generation hemoglobin-based oxygen carriers. *Artif Organs* **38**:708-714.
- Black KJ, Lock AT, Thomson LM, Cole AR, Tang X, Polizzotti BD and Kheir JN (2017) Hemodynamic Effects of Lipid-Based Oxygen Microbubbles via Rapid Intravenous Injection in Rodents. *Pharmaceutical research* **34**:2156-2162.
- Brockman EC, Jackson TC, Dixon CE, Baylr H, Clark RS, Vagni V, Feldman K, Byrd C, Ma L, Hsia C and Kochanek PM (2017) Polynitroxylated Pegylated Hemoglobin-A Novel, Small Volume Therapeutic for Traumatic Brain Injury Resuscitation: Comparison to Whole Blood and Dose Response Evaluation. *J Neurotrauma* **34**:1337-1350.
- Chen K, Merkel TJ, Pandya A, Napier ME, Luft JC, Daniel W, Sheiko S and DeSimone JM (2012) Low modulus biomimetic microgel particles with high loading of hemoglobin. *Biomacromolecules* **13**:2748-2759.
- Devineau S, Kiger L, Galacteros F, Baudin-Creuzat V, Marden M, Renault JP and Pin S (2018) Manipulating hemoglobin oxygenation using silica nanoparticles: a novel prospect for artificial oxygen carriers. *Blood advances* **2**:90-94.
- Elmer J, Alam HB and Wilcox SR (2012) Hemoglobin-based oxygen carriers for hemorrhagic shock. *Resuscitation* **83**:285-292.
- Feola M, Simoni J, Angelillo R, Lühruma Z, Kabakele M, Manzombi M and Kaluila M (1992) Clinical trial of a hemoglobin based blood substitute in patients with sickle cell anemia. *Surgery, gynecology & obstetrics* **174**:379-386.
- Fukui T, Kawaguchi AT, Takekoshi S, Miyasaka M, Sumiyoshi H and Tanaka R (2017) Liposome-Encapsulated Hemoglobin Accelerates Skin Wound Healing in Diabetic dB/dB Mice. *Artif Organs* **41**:319-326.
- Guo S, Wang P, Chen C, Meng Z, Qi D and Wang X (2016) Processing of ferulic acid modified hemoglobin. *Artif Cells Nanomed Biotechnol* **44**:1075-1079.
- Haruki R, Kimura T, Iwasaki H, Yamada K, Kamiyama I, Kohno M, Taguchi K, Nagao S, Maruyama T, Otagiri M and Komatsu T (2015) Safety Evaluation of Hemoglobin-Albumin Cluster "HemoAct" as a Red Blood Cell Substitute. *Scientific reports* **5**:12778.
- Jahr JS, Akha AS and Holtby RJ (2012) Crosslinked, polymerized, and PEG-conjugated hemoglobin-based oxygen carriers: clinical safety and efficacy of recent and current products. *Current drug discovery technologies* **9**:158-165.
- Jani VP, Jelvani A, Moges S, Nacharaju P, Roche C, Dantsker D, Palmer A, Friedman JM and Cabrales P (2017) Polyethylene Glycol Camouflaged Earthworm Hemoglobin. *PLoS One* **12**:e0170041.
- Kalocyte (2017) ErythroMer, in, Kalocyte Inc., St. Louis, MO, USA.
- Kao I, Xiong Y, Steffen A, Smuda K, Zhao L, Georgieva R, Pruss A and Baumler H (2018) Preclinical In Vitro Safety Investigations of Submicron Sized Hemoglobin Based Oxygen Carrier HbMP-700. *Artif Organs* **42**:549-559.
- Keipert PE and Investigators MC-S-S (2016) Clinical Evaluation of MP4CO: A Phase 1b Escalating-Dose, Safety and Tolerability Study in Stable Adult Patients with Sickle Cell Disease. *Adv Exp Med Biol* **923**:23-29.
- Kinasevitz GT, Privalle CT, Imm A, Steingrub JS, Malczynski JT, Balk RA and DeAngelo J (2008) Multicenter, randomized, placebo-controlled study of the nitric oxide scavenger

- pyridoxalated hemoglobin polyoxyethylene in distributive shock. *Crit Care Med* **36**:1999-2007.
- Kitagishi H, Mao Q, Kitamura N and Kita T (2017) HemoCD as a Totally Synthetic Artificial Oxygen Carrier: Improvements in the Synthesis and O<sub>2</sub> /CO Discrimination. *Artif Organs* **41**:372-380.
- Kohno M, Ikeda T, Hashimoto R, Izumi Y, Watanabe M, Horinouchi H, Sakai H, Kobayashi K and Iwazaki M (2017) Acute 40% exchange-transfusion with hemoglobin-vesicles in a mouse pneumonectomy model. *PLoS One* **12**:e0178724.
- Li B, He S, Qi Y, Xie Z, Chen X, Jing X and Huang Y (2014) Insight into the fabrication of polymeric particle based oxygen carriers. *International journal of pharmaceuticals* **468**:75-82.
- Li T, Yang G, Zhu Y, Tzang FC, Lau SH, Kwok SY, Wong BL and Liu L (2017) Beneficial effects of novel cross-linked hemoglobin YQ23 on hemorrhagic shock in rats and pigs. *The Journal of surgical research* **210**:213-222.
- Li Y, Yan D, Hao S, Li S, Zhou W, Wang H, Liu J, Wang X and Yang C (2015) Polymerized human placenta hemoglobin improves resuscitative efficacy of hydroxyethyl starch in a rat model of hemorrhagic shock. *Artif Cells Nanomed Biotechnol* **43**:174-179.
- Limited NBI (2017) YQ23, in, New B Innovation Limited.  
LLC ST Sanflow, VitalHeme, in, Sioux Falls, SD, USA.
- Lu M, Zhao C, Wang Q, You G, Wang Y, Deng H, Chen G, Xia S, Zhao J, Wang B, Li X, Shao L, Wu Y, Zhao L and Zhou H (2016) Preparation, characterization and in vivo investigation of blood-compatible hemoglobin-loaded nanoparticles as oxygen carriers. *Colloids and surfaces B, Biointerfaces* **139**:171-179.
- Misra H, Bainbridge J, Berryman J, Abuchowski A, Galvez KM, Uribe LF, Hernandez AL and Sosa NR (2017) A Phase Ib open label, randomized, safety study of SANGUINATE in patients with sickle cell anemia. *Rev Bras Hematol Hemoter* **39**:20-27.
- Misra H, Lickliter J, Kazo F and Abuchowski A (2014) PEGylated carboxyhemoglobin bovine (SANGUINATE): results of a phase I clinical trial. *Artif Organs* **38**:702-707.
- Moore EE, Johnson JL, Moore FA and Moore HB (2009a) The USA Multicenter Prehospital Hemoglobin-based Oxygen Carrier Resuscitation Trial: scientific rationale, study design, and results. *Critical care clinics* **25**:325-356, Table of Contents.
- Moore EE, Moore FA, Fabian TC, Bernard AC, Fulda GJ, Hoyt DB, Duane TM, Weireter LJ, Jr., Gomez GA, Cipolle MD, Rodman GH, Jr., Malangoni MA, Hides GA, Omert LA and Gould SA (2009b) Human polymerized hemoglobin for the treatment of hemorrhagic shock when blood is unavailable: the USA multicenter trial. *Journal of the American College of Surgeons* **208**:1-13.
- Neya S, Yonetani T and Kawaguchi AT (2014) Usefulness of myoglobin containing cobalt heme cofactor in designing a myoglobin-based artificial oxygen carrier. *Artif Organs* **38**:715-719.
- Olofsson C, Ahl T, Johansson T, Larsson S, Nellgard P, Ponzer S, Fagrell B, Przybelski R, Keipert P, Winslow N and Winslow RM (2006) A multicenter clinical study of the safety and activity of maleimide-polyethylene glycol-modified Hemoglobin (Hemospan) in patients undergoing major orthopedic surgery. *Anesthesiology* **105**:1153-1163.
- Olofsson CI, Gorecki AZ, Dirksen R, Kofranek I, Majewski JA, Mazurkiewicz T, Jahoda D, Fagrell B, Keipert PE, Hardiman YJ and Levy H (2011) Evaluation of MP4OX for prevention of perioperative hypotension in patients undergoing primary hip arthroplasty with spinal anesthesia: a randomized, double-blind, multicenter study. *Anesthesiology* **114**:1048-1063.
- Pan D, Rogers S, Misra S, Vulugundam G, Gazdzinski L, Tsui A, Mistry N, Said A, Spinella P, Hare G, Lanza G and Doctor A (2016) Erythromer (EM), a Nanoscale Bio-Synthetic Artificial Red Cell: Proof of Concept and in Vivo Efficacy Results. *Blood* **128**:1027.
- Qi Y, Li T, Wang Y, Wei X, Li B, Chen X, Xie Z, Jing X and Huang Y (2016) Synthesis of the Hemoglobin-Conjugated Polymer Micelles by Thiol Michael Addition Reactions. *Macromolecular bioscience* **16**:906-913.
- Qu J, Guo X, Li W, Hou W, Zhang H, Luo L, Zhu C, Yang J, Yin X, Tao Y, Du Y, Lou Y, Chen D and You J (2017) Preparation of artificial red cell and its application on alleviation of tumor hypoxia. *Colloids and surfaces B, Biointerfaces* **160**:446-454.

- Sakai H (2017) Overview of Potential Clinical Applications of Hemoglobin Vesicles (HbV) as Artificial Red Cells, Evidenced by Preclinical Studies of the Academic Research Consortium. *Journal of functional biomaterials* **8**.
- Seekell RP, Lock AT, Peng Y, Cole AR, Perry DA, Kheir JN and Polizzotti BD (2016) Oxygen delivery using engineered microparticles. *Proceedings of the National Academy of Sciences of the United States of America* **113**:12380-12385.
- Serruys PW, Vranckx P, Slagboom T, Regar E, Meliga E, de Winter RJ, Heyndrickx G, Schuler G, van Remortel EA, Dube GP and Symons J (2008) Haemodynamic effects, safety, and tolerability of haemoglobin-based oxygen carrier-201 in patients undergoing PCI for CAD. *EuroIntervention* **3**:600-609.
- Shen L, Qu R, Shi H, Huang F, An Y and Shi L (2016) A biocompatible cobaltporphyrin-based complex micelle constructed via supramolecular assembly for oxygen transfer. *Biomaterials science* **4**:857-862.
- Simoni J, Simoni G, Moeller JF, Feola M and Wesson DE (2014) Artificial oxygen carrier with pharmacologic actions of adenosine-5'-triphosphate, adenosine, and reduced glutathione formulated to treat an array of medical conditions. *Artif Organs* **38**:684-690.
- Toma VA, Farcas AD, Roman I, Sevastre B, Hathazi D, Scurtu F, Damian G and Silaghi-Dumitrescu R (2018) In vivo evaluation of hemerythrin-based oxygen carriers: Similarities with hemoglobin-based counterparts. *International journal of biological macromolecules* **107**:1422-1427.
- van der Linden P, Gazdzik TS, Jahoda D, Heylen RJ, Skowronski JC, Pellar D, Kofranek I, Gorecki AZ, Fagrell B, Keipert PE, Hardiman YJ and Levy H (2011) A double-blind, randomized, multicenter study of MP4OX for treatment of perioperative hypotension in patients undergoing primary hip arthroplasty under spinal anesthesia. *Anesthesia and analgesia* **112**:759-773.
- Wang Q, Zhang R, Lu M, You G, Wang Y, Chen G, Zhao C, Wang Z, Song X, Wu Y, Zhao L and Zhou H (2017a) Bioinspired Polydopamine-Coated Hemoglobin as Potential Oxygen Carrier with Antioxidant Properties. *Biomacromolecules* **18**:1333-1341.
- Wang Q, Zhang R, You G, Hu J, Li P, Wang Y, Zhang J, Wu Y, Zhao L and Zhou H (2018) Influence of polydopamine-mediated surface modification on oxygen-release capacity of haemoglobin-based oxygen carriers. *Artif Cells Nanomed Biotechnol*:1-9.
- Wang Y, Wang L, Yu W, Gao D, You G, Li P, Zhang S, Zhang J, Hu T, Zhao L and Zhou H (2017b) A PEGylated bovine hemoglobin as a potent hemoglobin-based oxygen carrier. *Biotechnology progress* **33**:252-260.
- Webster KD, Dahhan D, Otto AM, Frosti CL, Dean WL, Chaires JB and Olsen KW (2017) "Inside-Out" PEGylation of Bovine beta-Cross-Linked Hemoglobin. *Artif Organs* **41**:351-358.
- Wollocko H, Anvery S, Wollocko J, Harrington JM and Harrington JP (2017) Zero-link polymerized hemoglobin (OxyVitaHb) stabilizes the heme environment: potential for lowering vascular oxidative stress. *Artif Cells Nanomed Biotechnol* **45**:701-709.
- Wu M, Feng K, Li Q, Ma H, Zhu H, Xie Y, Yan G, Chen C and Yan K (2017) Glutaraldehyde-polymerized hemoglobin and tempol (PolyHb-tempol) has superoxide dismutase activity that can attenuate oxidative stress on endothelial cells induced by superoxide anion. *Artif Cells Nanomed Biotechnol*:1-9.
- Yadav VR, Rao G, Houson H, Hedrick A, Awasthi S, Roberts PR and Awasthi V (2016) Nanovesicular liposome-encapsulated hemoglobin (LEH) prevents multi-organ injuries in a rat model of hemorrhagic shock. *Eur J Pharm Sci* **93**:97-106.
- Yu C, Huang X, Qian D, Han F, Xu L, Tang Y, Bao N and Gu H (2018) Fabrication and evaluation of hemoglobin-based polydopamine microcapsules as oxygen carriers. *Chemical communications (Cambridge, England)* **54**:4136-4139.
